# Supplementary material for: MEGF11 is related to tumour recurrence in triple negative breast cancer via chemokine upregulation
Source: PubMed Central journal article supplement (PMC7229019; doi:10.1038/s41598-020-64950-0), 2020-05-15

## Supplementary references

MEGF11 is related to tumor recurrence in triple negative breast cancer via chemokine up-regulation

Jen-Hwey Chiu, MD, PhD<sup>1,2,3\*</sup>, Ling-Ming Tseng, MD<sup>1,4</sup>, Tzu-Ting Huang PhD<sup>1,5</sup>,

Chun-Yu Liu, MD, PhD<sup>1,6</sup>, Jir-You Wang, PhD<sup>7</sup>, Ching-Po Huang<sup>8</sup>, Yi-Fang Tsai,

MD<sup>1,9</sup>, Chih-Yi Hsu, MD<sup>10,11</sup>

### Supplementary information 1.

In our previous study (PMID: 26458489), many genes including *MEGF11* gene was identified by differentially displayed microarray analysis in 15 paired recurrent and non-recurrent TNBC samples. Then we performed real-time PCR-based solution for high-throughput 224 gene expression analysis inpaired TNBC tissue samples (16 recurrent and 24 non-recurrent tissues), and found that *MEGF11* was the top one gene that had higher transcription expression in recurrent TNBC tumors that non-recurrent ones. Each gene was analyzed in triplicate.

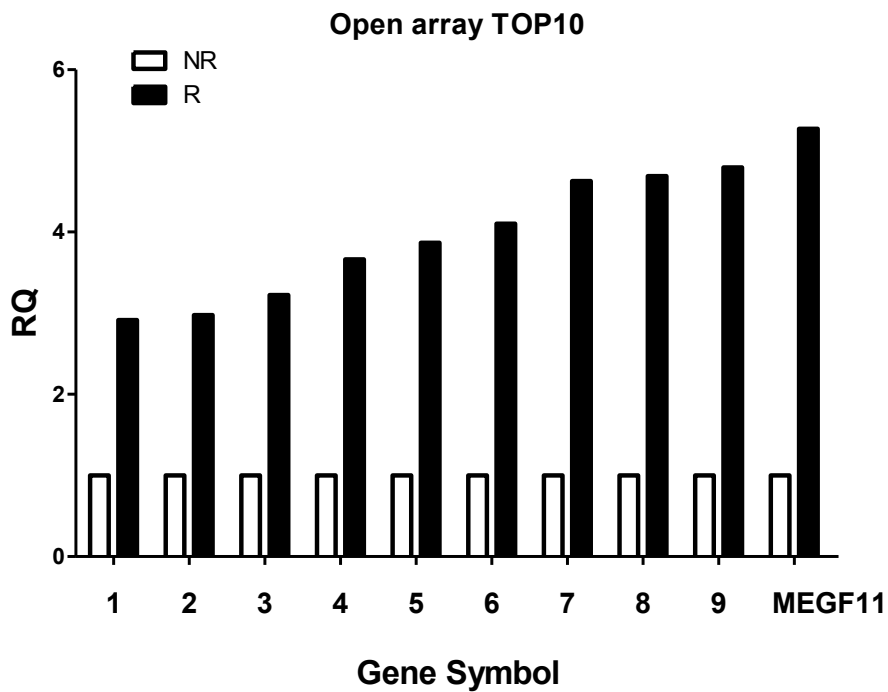

### Supplementary information2.

Kaplan-Meier plotter database spit patient by upper quartile showed a negative correlation between *MEGF11* gene up-regulation and patients' DFS. The desired Affymetrix IDs is valid: 1569879\_a\_at (*MEGF11*).

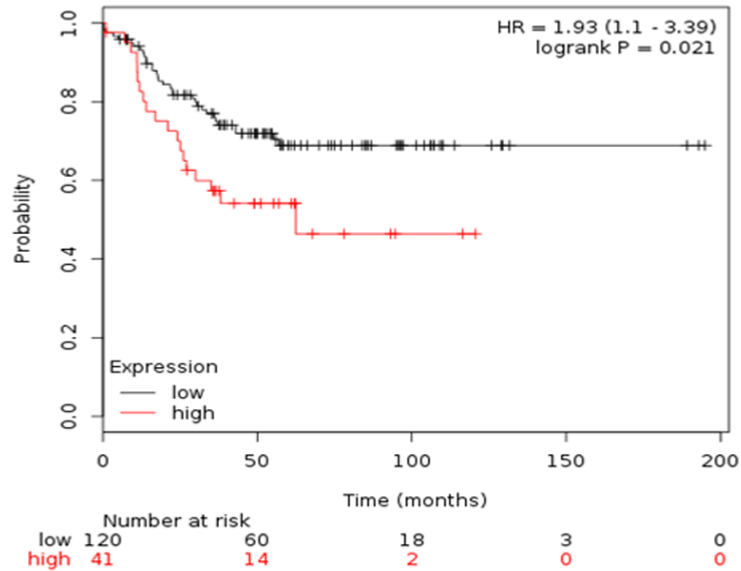

[Download plot as a PDF](#) The desired Affymetrix IDs is valid: 1569879\_a\_at (*MEGF11*)

### Supplementary information3.

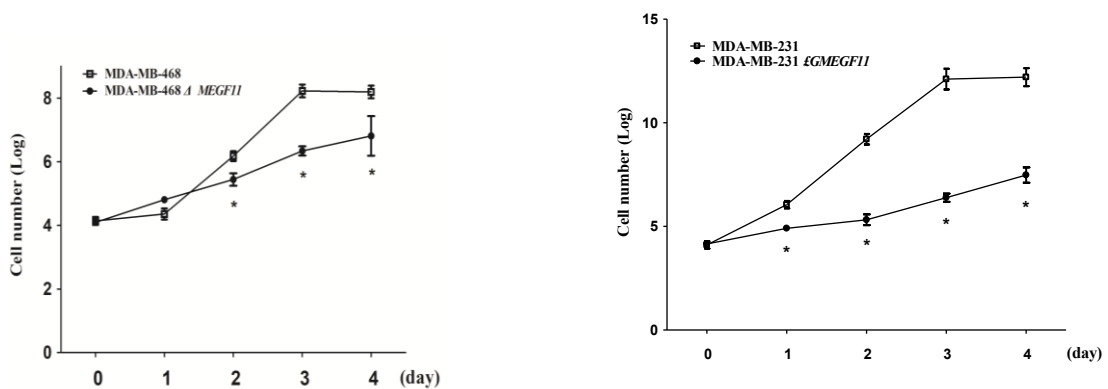

Growth curves of TNBC MDA-MB-231 and MDA-MB-468 without (wild type) and with *MEGF11* knocked down ( $\Delta$ *MEGF11*). \*,  $p < 0.05$ , Two-way ANOVA.

#### Supplementary information4.

Cell cycle analysis in o/e MEGF11 MDA-MB-231/468 cells disclosed no significant change in S- or S+G2M phase fraction compared to the scramble group.

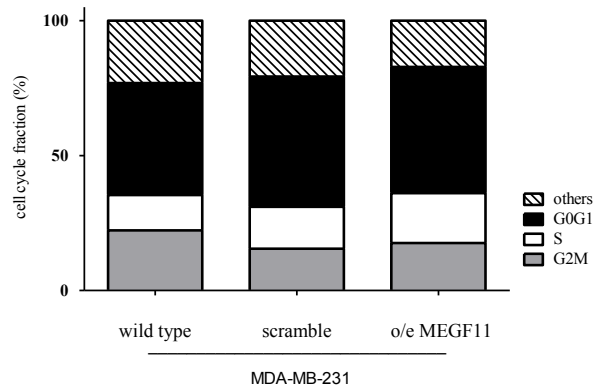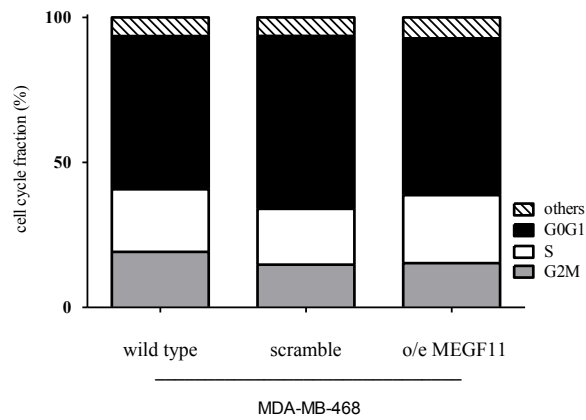

## Supplementary information5.

Ingenuity Pathway Analysis (IPA) for MEGF11-related gene expression.

### Top Canonical Pathways

| Name                                               | p-value  | Overlap    |
|----------------------------------------------------|----------|------------|
| Granulocyte Adhesion and Diapedesis                | 8.69E-11 | 3.9% 7/179 |
| Agranulocyte Adhesion and Diapedesis               | 1.32E-10 | 3.7% 7/190 |
| Role of IL-17A in Psoriasis                        | 2.65E-10 | 30.8% 4/13 |
| Role of IL-17A in Arthritis                        | 3.10E-07 | 5.8% 4/69  |
| Hepatic Fibrosis/ Hepatic Stellate Cell Activation | 4.10E-07 | 2.7% 5/187 |

### Top Disease and Disorders

| Name                                | p-value           | #Molecules |
|-------------------------------------|-------------------|------------|
| Inflammatory Response               | 8.50E-04-2.92E-14 | 15         |
| Hematological Disease               | 8.50E-04-1.57E-09 | 7          |
| Immunological Disease               | 8.50E-04-1.57E-09 | 11         |
| Organismal Injury and Abnormalities | 8.50E-04-1.57E-09 | 16         |
| Gastrointestinal Disease            | 8.50E-04-1.47E-08 | 13         |

| Categories                                                                      | p-Value  | Molecules                                               | # Molecules |
|---------------------------------------------------------------------------------|----------|---------------------------------------------------------|-------------|
| Cell-To-Cell Signaling and Interaction                                          | 5.62E-15 | CCL20,CD14,CXCL1,CXCL2,CXCL3,CXCL8,GDF15,IL6,IL1R1,IL6  | 10          |
| Cell-To-Cell Signaling and Interaction                                          | 9.42E-15 | CCL20,CD14,CX3CL1,CXCL1,CXCL2,CXCL3,CXCL8               | 11          |
| Cell-To-Cell Signaling and Interaction                                          | 2.92E-14 | CCL20,CD14,CX3CL1,CXCL1,CXCL2,CXCL3,CXCL8               | 10          |
| Cell-To-Cell Signaling and Interaction                                          | 1E-13    | CCL20,CD14,CXCL1,CXCL2,CXCL3,CXCL8,IL1R1,IL6            | 9           |
| Cellular Movement, Hematological System Development and Differentiation         | 1.88E-13 | CCL20,CD14,CX3CL1,CXCL1,CXCL2,CXCL3,CXCL8               | 12          |
| Cellular Movement, Hematological System Development and Differentiation         | 4.12E-13 | CCL20,CD14,CX3CL1,CXCL1,CXCL2,CXCL3,CXCL8               | 13          |
| Cell-To-Cell Signaling and Interaction                                          | 1.91E-12 | CCL20,CD14,CX3CL1,CXCL1,CXCL2,CXCL3,CXCL8               | 10          |
| Cellular Movement, Hematological System Development and Differentiation         | 4.07E-12 | CD14,CX3CL1,CXCL1,CXCL2,CXCL3,CXCL8,GDF15,IL6,IL1R1,IL6 | 10          |
| Cellular Movement, Hematological System Development and Differentiation         | 8.26E-12 | CCL20,CD14,CX3CL1,CXCL1,CXCL2,CXCL3,CXCL8               | 11          |
| Cell-To-Cell Signaling and Interaction                                          | 1.01E-11 | CXCL1,CXCL2,CXCL3,CXCL8,GDF15,IL1R1,IL6                 | 7           |
| Cell Death and Survival                                                         | 1.34E-11 | CD14,CX3CL1,CXCL1,CXCL2,CXCL8,IL6,LCN2,NADPH oxidase    | 8           |
| Cell Death and Survival                                                         | 1.91E-11 | CD14,CX3CL1,CXCL1,CXCL2,CXCL8,IL6,LCN2,NADPH oxidase    | 8           |
| Cellular Movement, Hematological System Development and Differentiation         | 1.96E-11 | CD14,CX3CL1,CXCL1,CXCL2,CXCL3,CXCL8,IL1R1,IL6           | 9           |
| Cell Death and Survival                                                         | 2.36E-11 | CXCL1,CXCL2,CXCL8,IL6,LCN2,NADPH oxidase                | 6           |
| Cellular Movement, Skeletal and Muscular System Development and Differentiation | 2.6E-11  | CXCL1,CXCL2,CXCL3,CXCL8                                 | 4           |
| Hematological System Development and Differentiation                            | 5.67E-11 | CXCL1,CXCL2,CXCL3,CXCL8,IL1R1,LCN2                      | 6           |
| Hematological System Development and Differentiation                            | 6.3E-11  | CX3CL1,CXCL1,CXCL2,CXCL3,CXCL8,IL1R1,LCN2               | 7           |
| Cellular Movement, Hematological System Development and Differentiation         | 7.51E-11 | CCL20,CX3CL1,CXCL1,CXCL2,CXCL3,CXCL8,IL1R1,IL6          | 9           |
| Cell-To-Cell Signaling and Interaction                                          | 9.77E-11 | CX3CL1,CXCL1,CXCL2,CXCL3,CXCL8,IL1R1,IL6                | 7           |
| Cell-To-Cell Signaling and Interaction                                          | 1.78E-10 | CXCL1,CXCL2,CXCL3,CXCL8,IL1R1,IL6                       | 6           |
| Cellular Movement                                                               | 1.89E-10 | CX3CL1,CXCL2,CXCL3,CXCL8,GDF15,IL6,STC1                 | 7           |
| Hematological System Development and Differentiation                            | 2.06E-10 | CX3CL1,CXCL1,CXCL2,CXCL3,CXCL8,IL1R1,IL6,LCN2           | 8           |
| Cellular Movement, Hematological System Development and Differentiation         | 2.18E-10 | CX3CL1,CXCL1,CXCL2,CXCL3,CXCL8,IL1R1,LCN2               | 7           |
| Cell-To-Cell Signaling and Interaction                                          | 2.53E-10 | CCL20,CX3CL1,CXCL3,CXCL8,IL1R1,IL6                      | 6           |
| Cell-To-Cell Signaling and Interaction                                          | 2.84E-10 | CD14,CXCL1,CXCL3,CXCL8,IL6,LCN2                         | 6           |
| Cellular Movement, Hematological System Development and Differentiation         | 2.9E-10  | CD14,CX3CL1,CXCL2,CXCL3,CXCL8,IL1R1,IL6,LCN2            | 9           |
| Inflammatory Response                                                           | 3.46E-10 | CCL20,CD14,CX3CL1,CXCL1,CXCL2,CXCL3,CXCL8               | 11          |

## Supplementary information 6.

For the tumor metastasis study, wild type, and knocked down MEGF11 ( $\Delta$ MEGF11) mouse mammary 4T1 cells were orthotopically injected into two fat pads (left upper and right lower mammary glands) of 8-wk female BALB/c mice. We used two clones of  $\Delta$ megf11 lentivirus, 119472 and 119473, to knock down MEGF11 expression, followed by validation by Western blot analysis. The results demonstrated that the clone of 119472 had better efficiency to knock down MEGF11 expression than the 119473 clone (A, B).

**A**

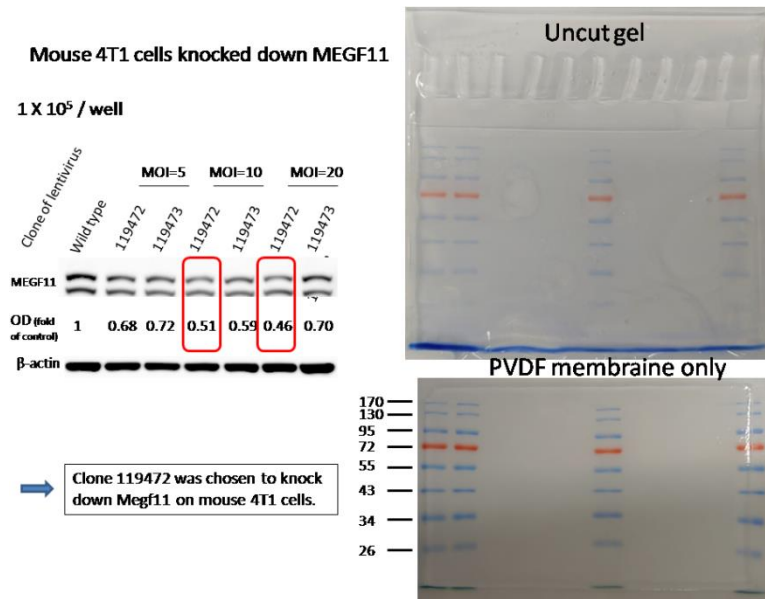

**B**

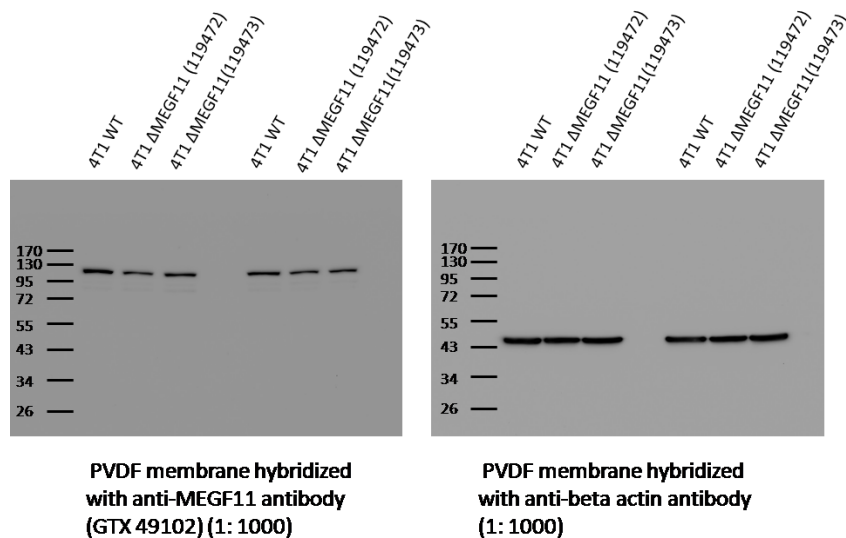

After the animals were sacrificed, the implanted tumors removed from wild type or  $\Delta$ MEGF11 mice were analyzed with Western blot (C) and immunohistochemistry (D). The results showing that there were decreased MEGF11 expression in the tumors of  $\Delta$ MEGF11 mice compared to the wild type, both in Western blot and immunochemistry analysis.

C

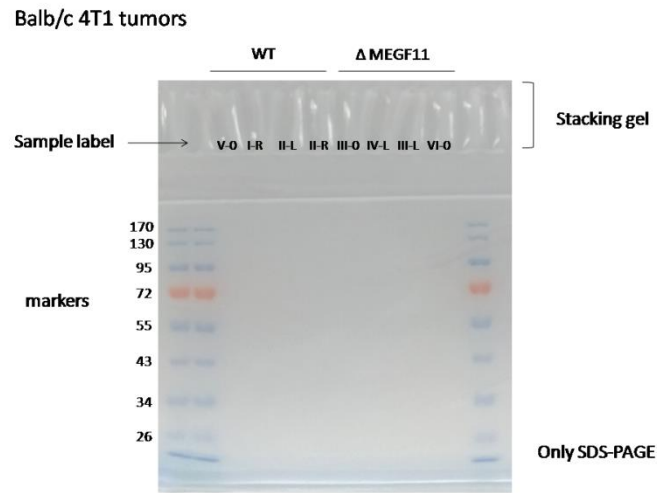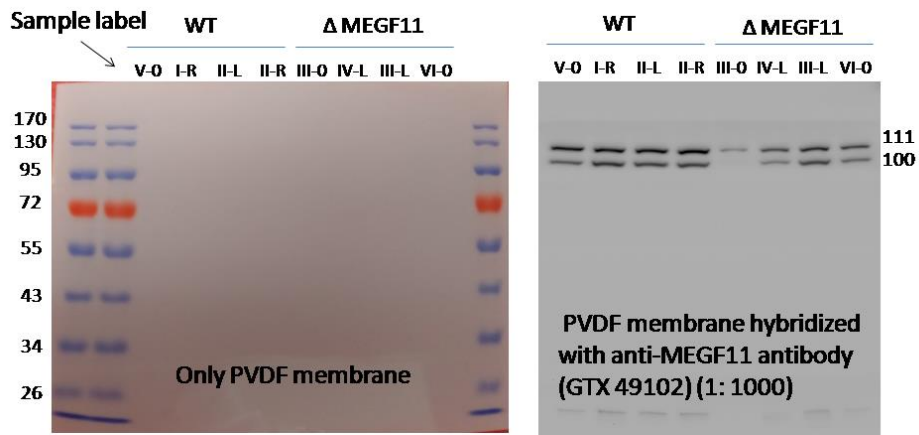

D

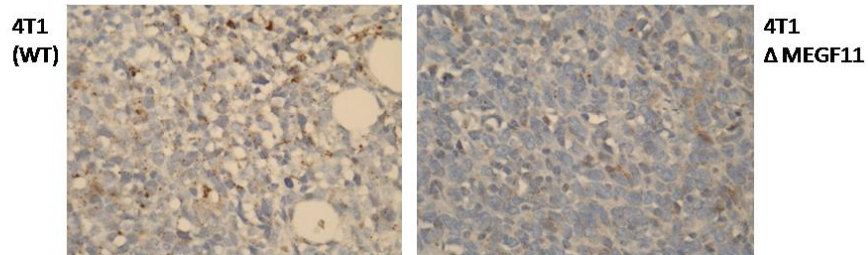

The unprocessed blots for Western blot in this manuscript are demonstrated as the followings.

Fig. 2A

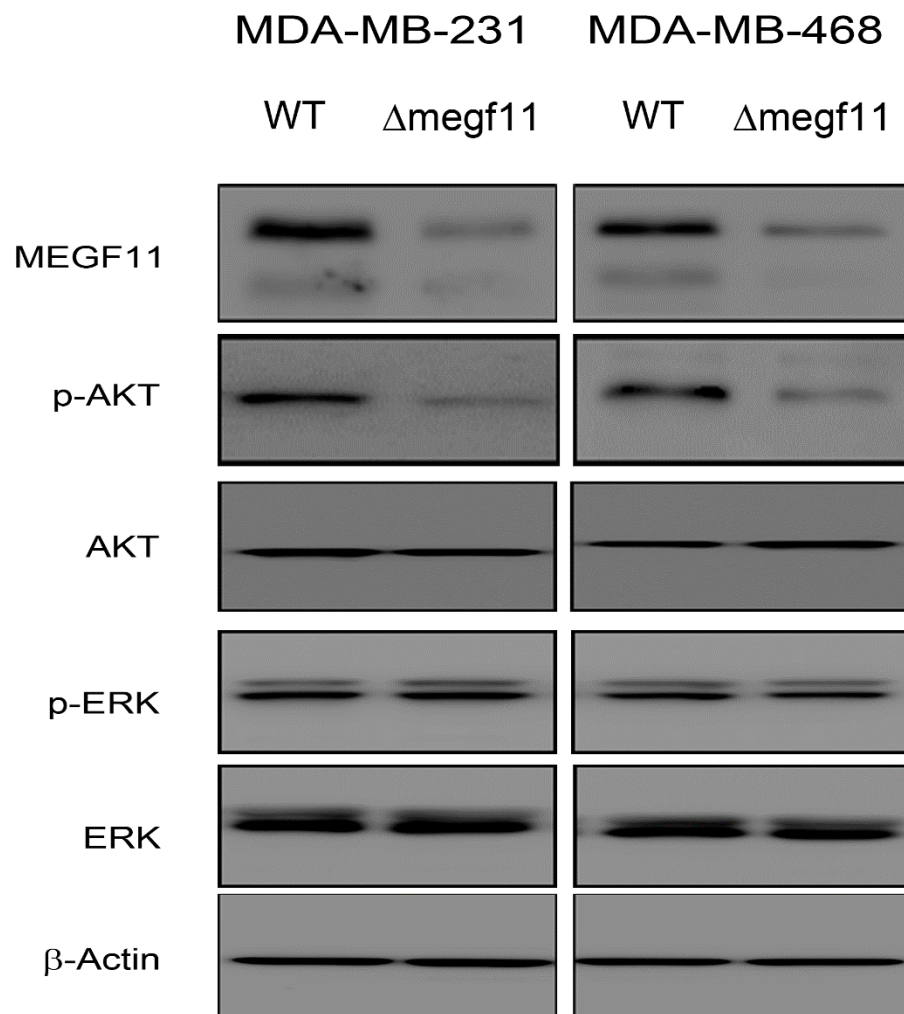



**Fig. 2B**

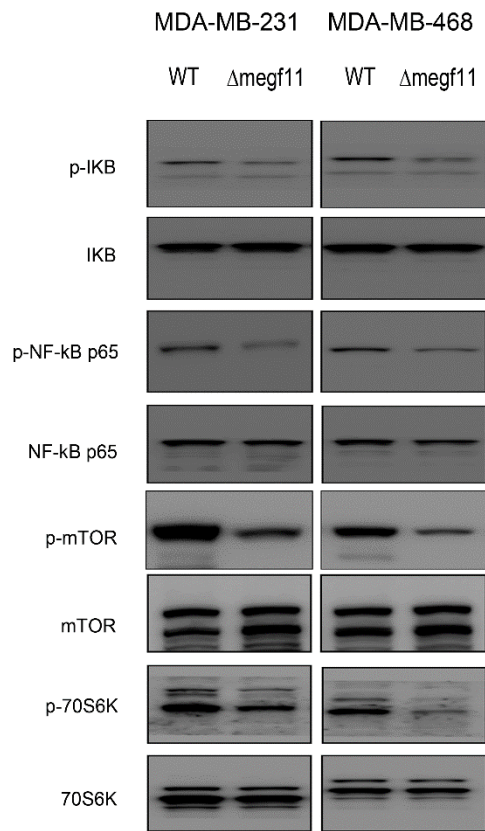

**Fig. 2C**

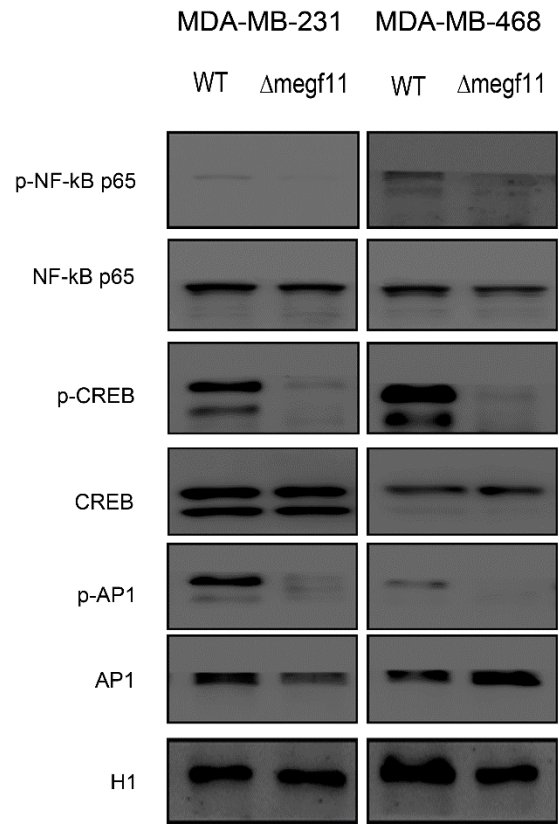

**Fig. 3C**

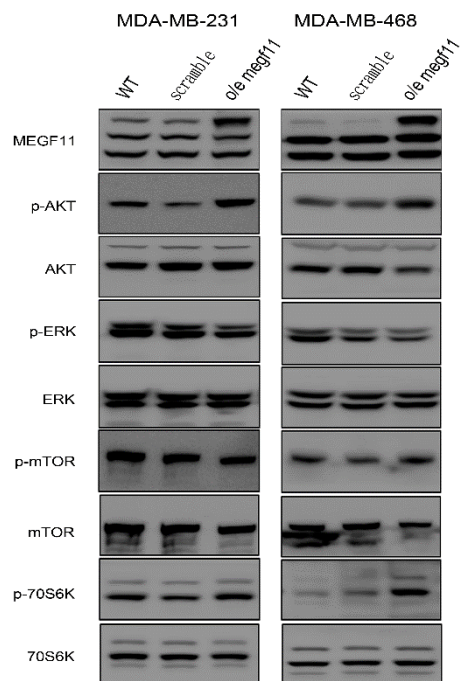

**Fig. 3E**

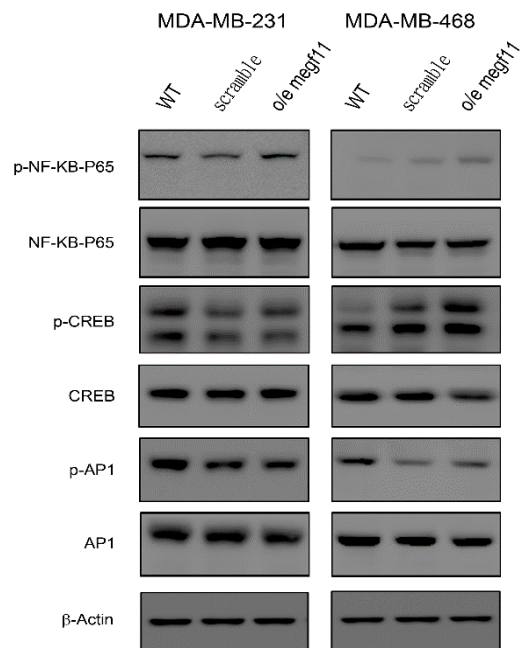

**Fig. 4B**

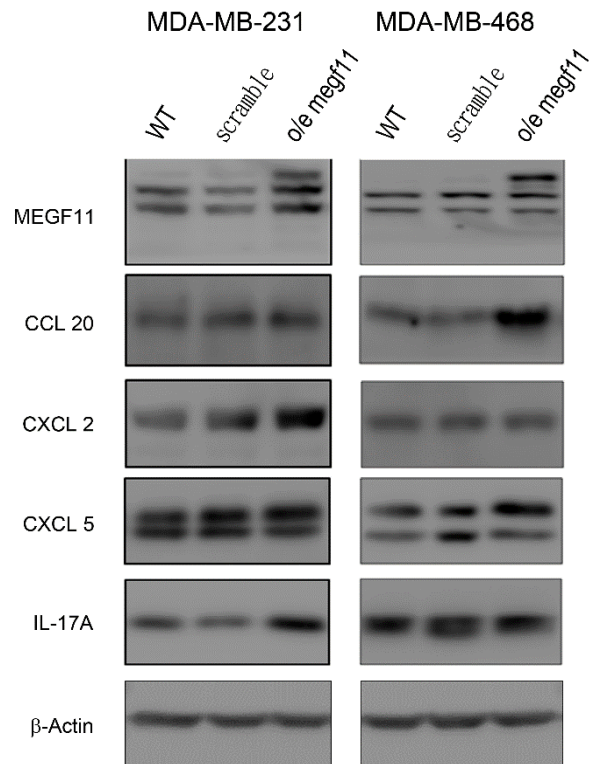

**Fig. 5C**

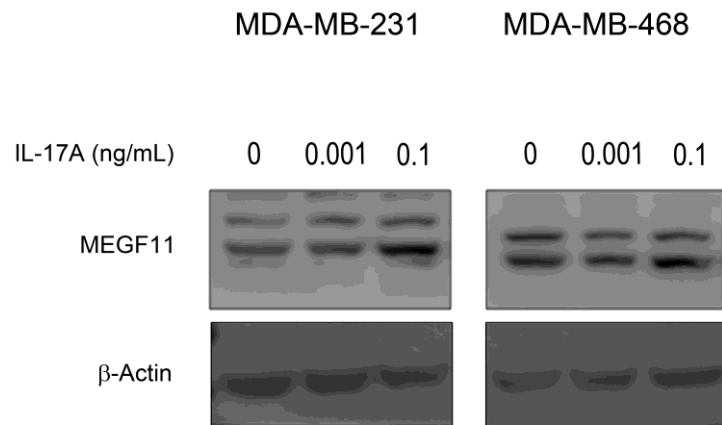

**Fig. 5D**

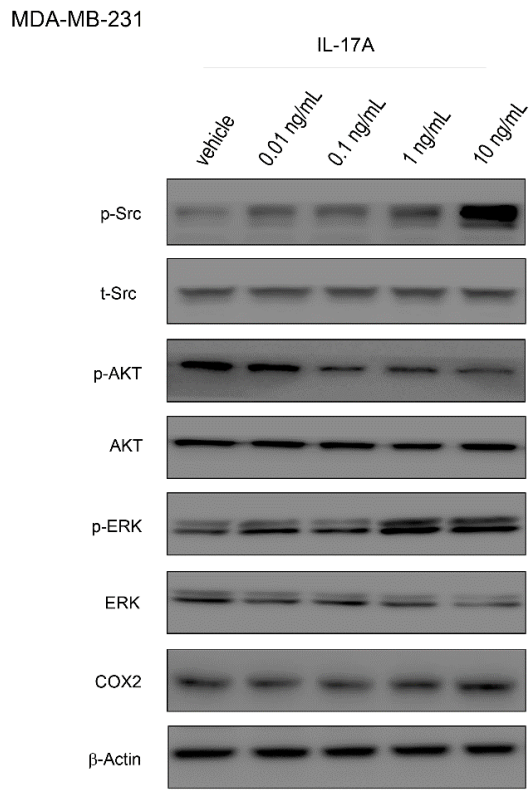

**Fig. 5E**

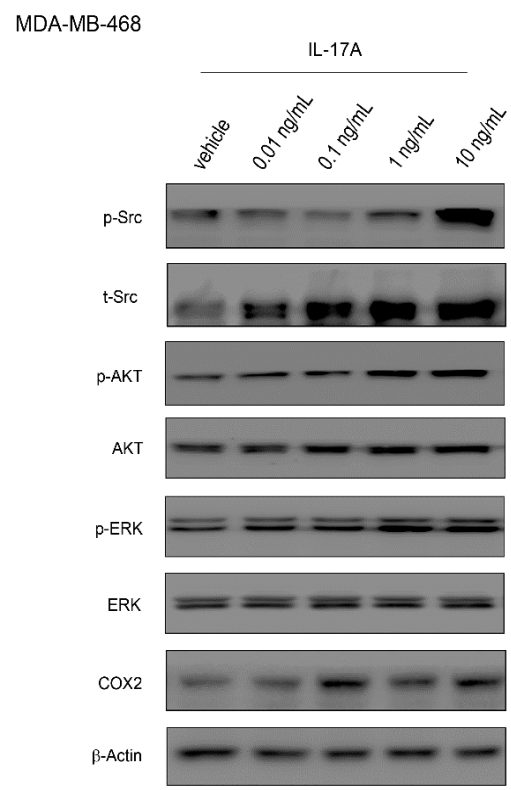

**Fig. 6A**

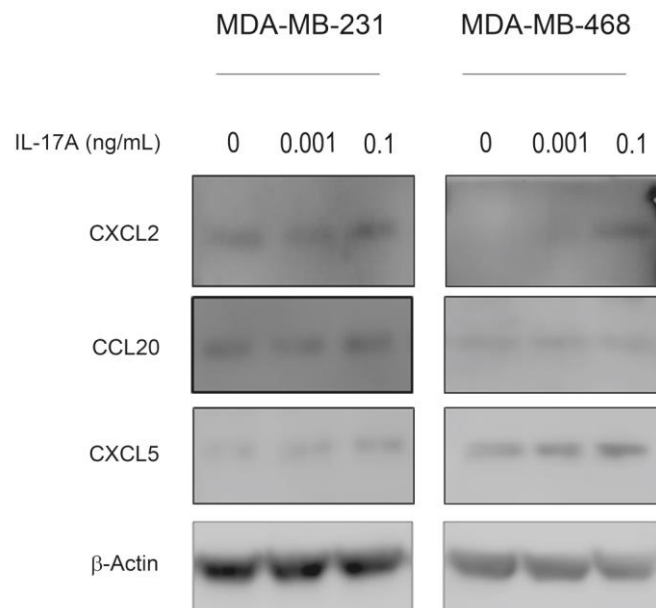

**Fig. 7B**

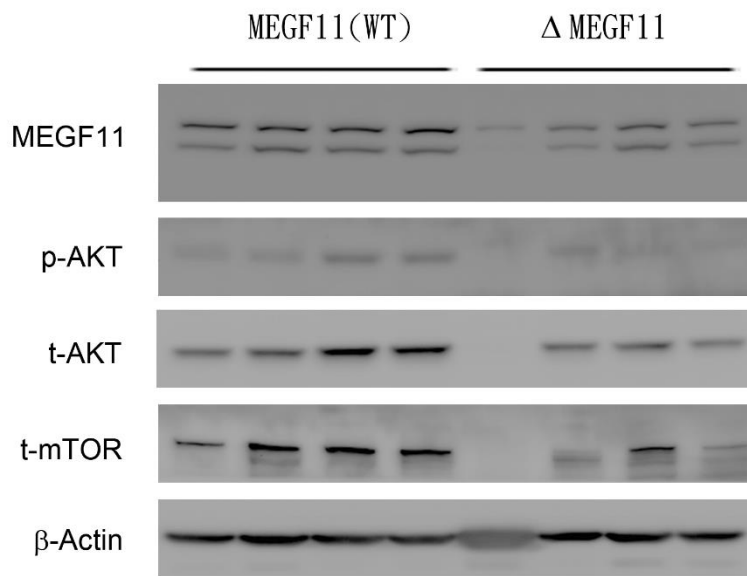

**Supplementary information7.**

Co-localization with immunofluorescent staining on MDA-MB-231 and MDA-MB-468. MEGF11 was localized with primary antibodies, followed by 2<sup>nd</sup> antibody conjugated with FITC (for MEGF11) or Rodamine (for Gs protein or EGFR), respectively. The results disclosed that MEGF11 protein was not co-localized with Gs protein or with EGFR in TNBC cells.

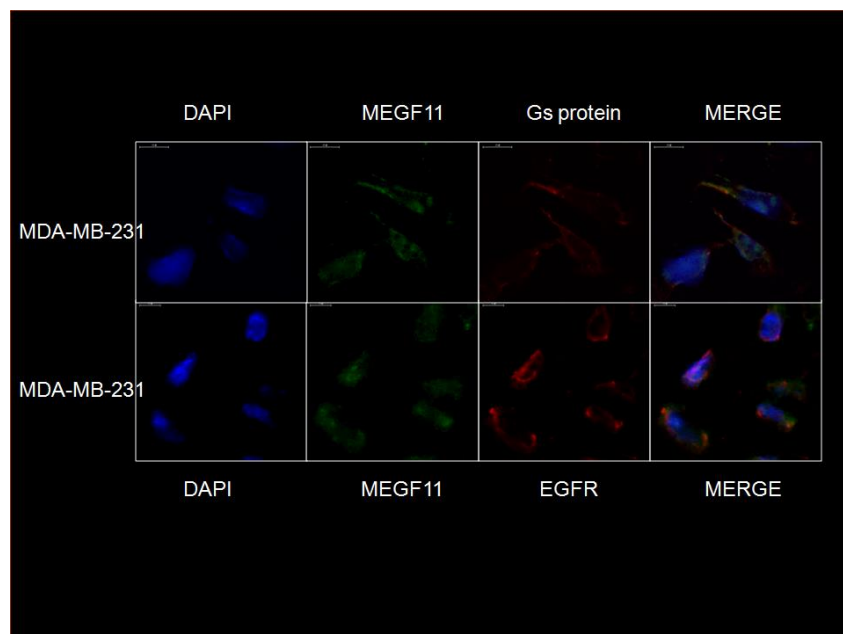

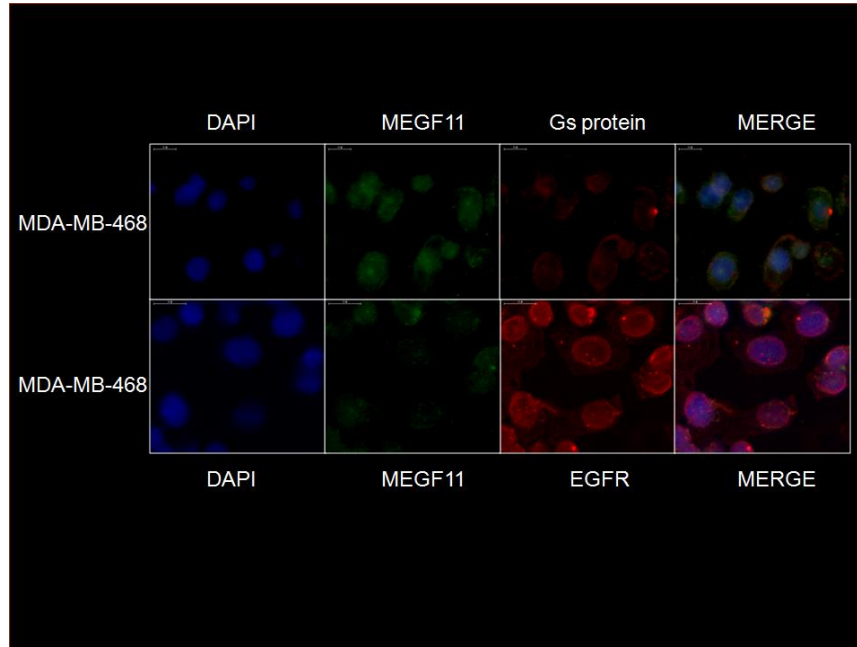

### Supplementary information8.

The role of MEGF11 on BDNF and TrkB gene expression. There were up-regulated brain-derived neurotrophic factor (BDNF) and its receptor (TrkB) gene expression in TNBC MDA-MB-231 and MDA-MB-468 lines.

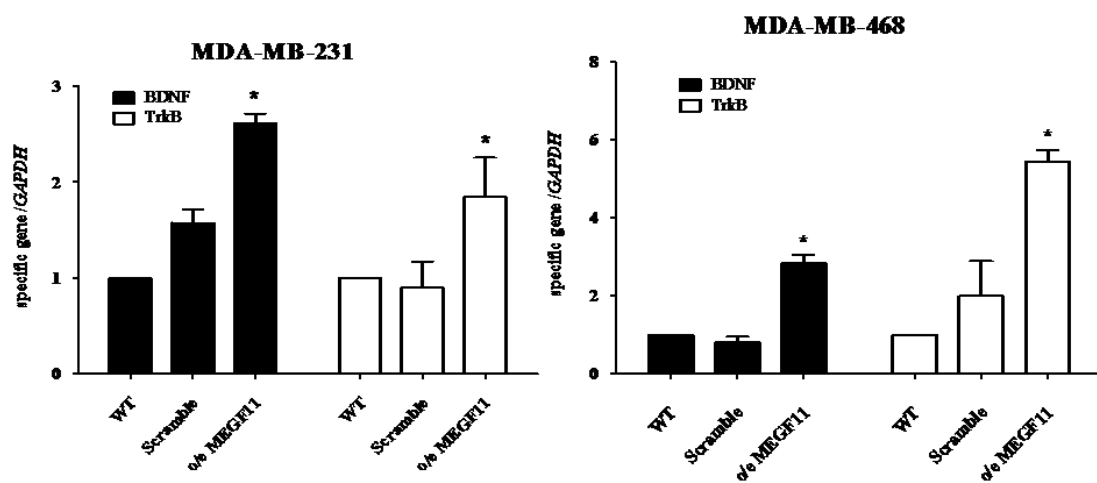

### Supplementary information 9.

| Antibody                   | Host   | Clonality  | Molecular (kDa) | company        | catalog No. | WB titer |
|----------------------------|--------|------------|-----------------|----------------|-------------|----------|
| MEGF11                     | Rabbit | Polyclonal | 111 (100)       | Genetex        | GTX49102    | 1:1000   |
| p-Akt (Ser473)             | Rabbit | Polyclonal | 60              | Cell Signaling | #9271       | 1:1000   |
| p-ERK (Thr202/Tyr204)      | Rabbit | Polyclonal | 42, 44          | Cell Signaling | #9101       | 1:1000   |
| Akt                        | Rabbit | Polyclonal | 60              | Cell Signaling | #9272       | 1:1000   |
| ERK [p44/42 MAPK (Erk1/2)] | Rabbit | Monoclonal | 42, 44          | Cell Signaling | #4695       | 1:1000   |
| p-p65 (Ser536)             | Rabbit | Monoclonal | 65              | Cell Signaling | #3033       | 1:1000   |
| p65                        | Rabbit | Monoclonal | 65              | Cell Signaling | #8242       | 1:1000   |
| p-CREB (Ser133)            | Mouse  | Monoclonal | 46              | Cell Signaling | #9196       | 1:1000   |
| CREB                       | Rabbit | Monoclonal | 43              | Cell Signaling | #9197       | 1:1000   |
| p-p70S6K (Thr389)          | Rabbit | Polyclonal | 70, 85          | Cell Signaling | #9205       | 1:1000   |
| p70S6K                     | Rabbit | Polyclonal | 70, 85          | Cell Signaling | #9202       | 1:1000   |
| p-c-Jun (Ser63) (Ap1)      | Rabbit | Polyclonal | 48              | Cell Signaling | #9261       | 1:1000   |
| c-Jun (Ap1)                | Rabbit | Monoclonal | 43, 48          | Cell Signaling | #9165       | 1:1000   |
| p-mTOR (Ser2448)           | Rabbit | Polyclonal | 289             | Cell Signaling | #2971       | 1:1000   |
| m-TOR                      | Rabbit | Monoclonal | 289             | Cell Signaling | #2983       | 1:1000   |
| IL-17A (for human)         | Mouse  | Monoclonal | 17              | R & D          | MAB3171     | 1:250    |
| beta-actin                 | Mouse  | Monoclonal | 42              | Cell Signaling | #3700S      | 1:1000   |

### Supplementary information 10.

To compare the specificity of different anti-MEGF11 antibody on market, we performed Western blot on MEGF11-overexpressed TNBC with two different antibodies. The results demonstrated that the antibody from Genetex (GTX49102), which was used in our studies, recognized MEGF11 protein isoforms more specifically than that from Thermo Fisher Scientific (Invitrogen, PA5-40109) (A).

A

## Different anti-MEGF11 antibody

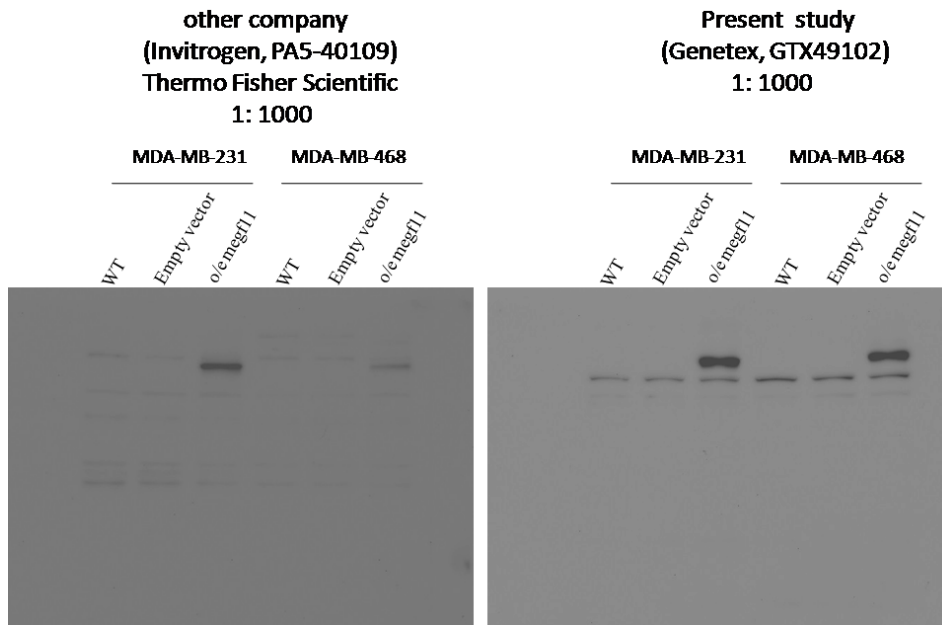

MEGF11 antibody may recognize two isoforms. Uniport shows that isoform 1 is 111 kDa and isoform 2 is 100 kDa. Our results for validation of anti-MEGF antibody (Genetex, GTX49102) demonstrated that this antibody recognizes one major (111 kDa) isoform and one minor (100 kDa) isoform of endogenous MEGF11 on wild type and  $\Delta$  *megf11* TNBC cells lines. Immunohistochemistry on paraffin-embedded blocks from different lines (wild type,  $\Delta$  *megf11*, empty vector (scramble), and over-expressed *megf11* TNBC MDA-MB-231/MDA-MB-468), which were stained with anti-MEGF antibody (Genetex, GTX49102), showed that there was a decreased MEGF11 expression in  $\Delta$  *megf11* lines than wild type (B).

B

## Genetex, GTX49102

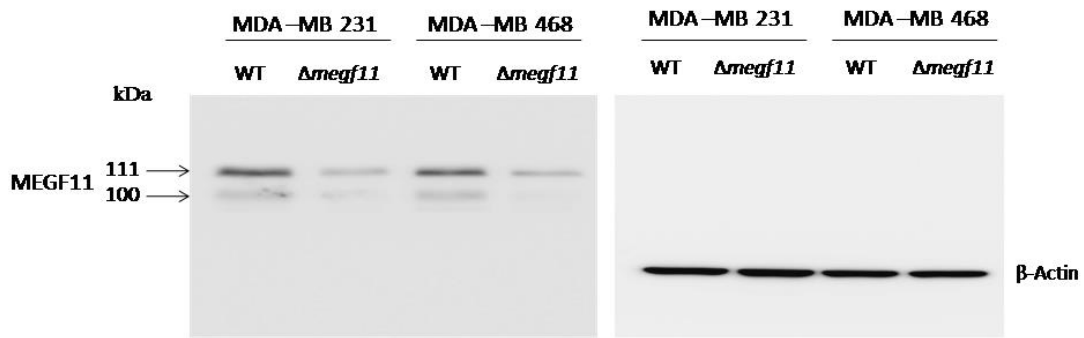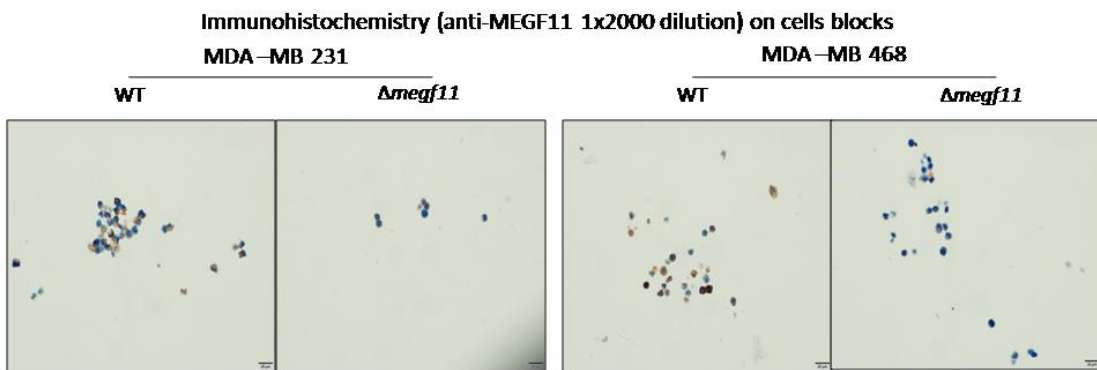

We constructed the MEGF11 over-expression vector that was generated by amplification of the full-length MEGF11 cDNA and cloned into a GFP-containing vector. Therefore, the anti-MEGF11 antibody recognized a third (137 kDa) MEGF11-GFP fusion protein, in addition to two endogenous MEGF11 isoforms (111 kDa and 100 kDa), on MEGF11 over-expressed TNBC cell lines (C). Immunohistochemistry staining also showed that there was an increased MEGF11 expression in *o/e megf11* lines than wild type (D).

..

C



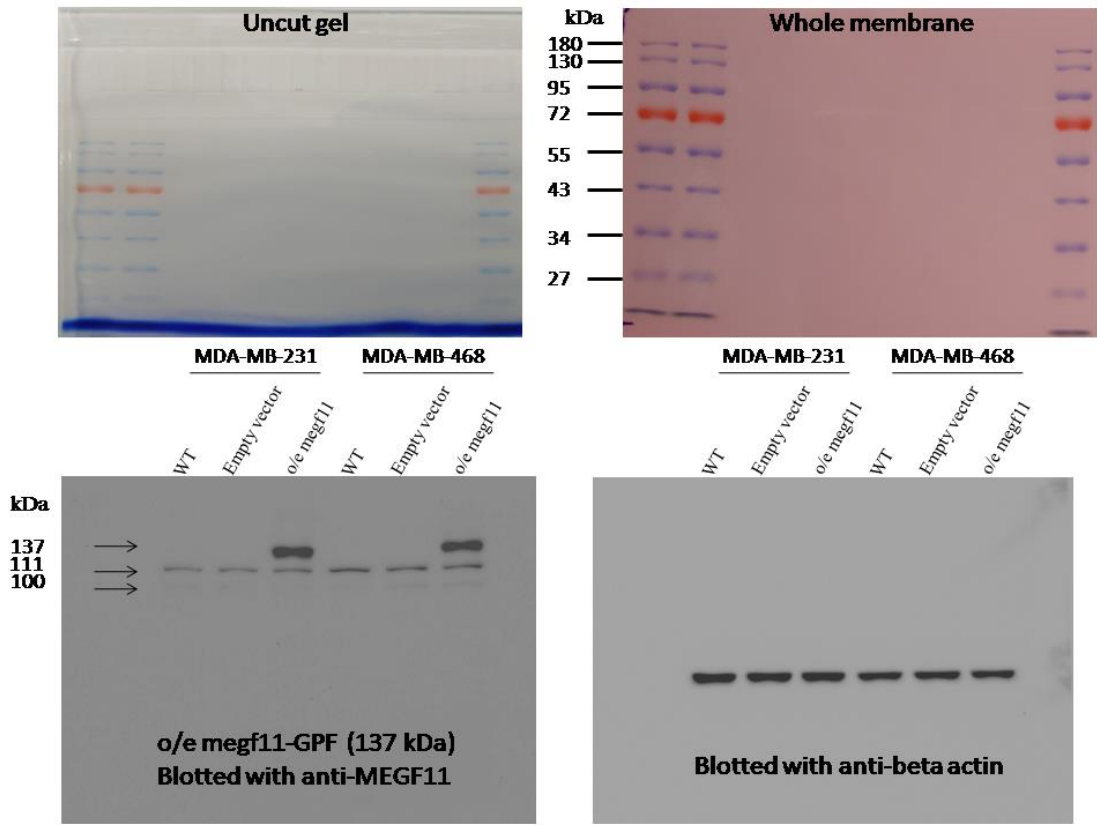

D

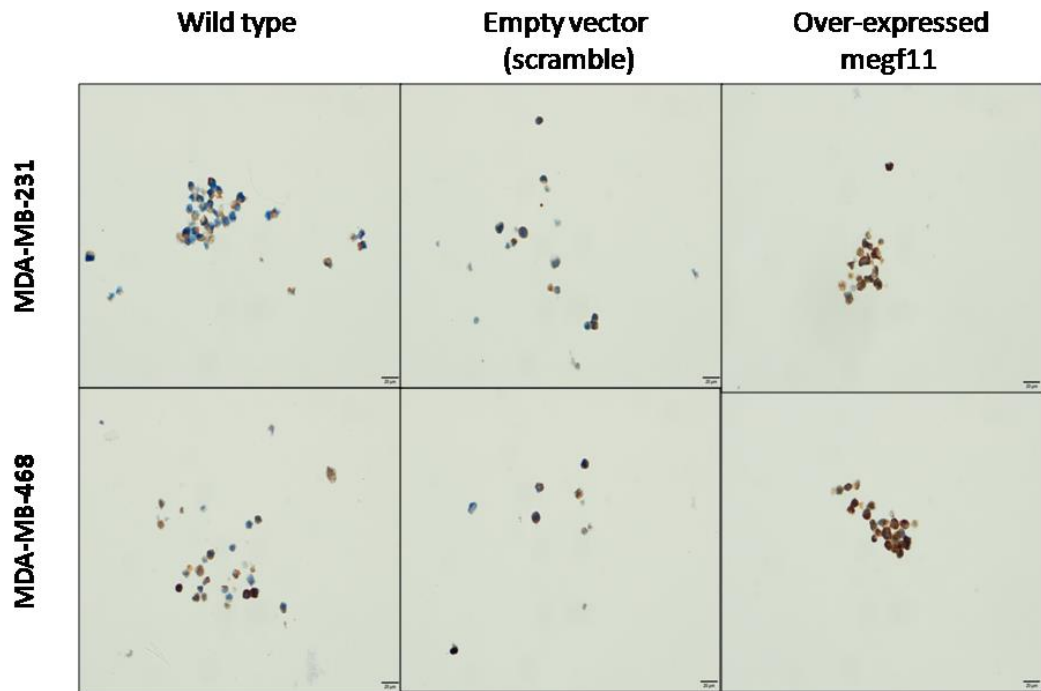

According to “The Human Protein Atlas”, MEGF11 is classified as predicted intracellular and membrane protein. Our IHC studies demonstrate that this antibody recognizes intracellular MEGF11 protein. Human skin tissue is used as a MEGF11(+) control, while uterine cervix, prostate and pancreas tissues are used as MEGF11 (-) control. Our results disclose that no back ground (non-specific) staining on these MEGF11(-) tissues but a specific staining on MEGF11(+) tissue (skin) are noticed, indicating the specificity of this antibody. Besides, the MEGF11 expression on different TNBC tissue ranges from (-) to (+++) (E).

E

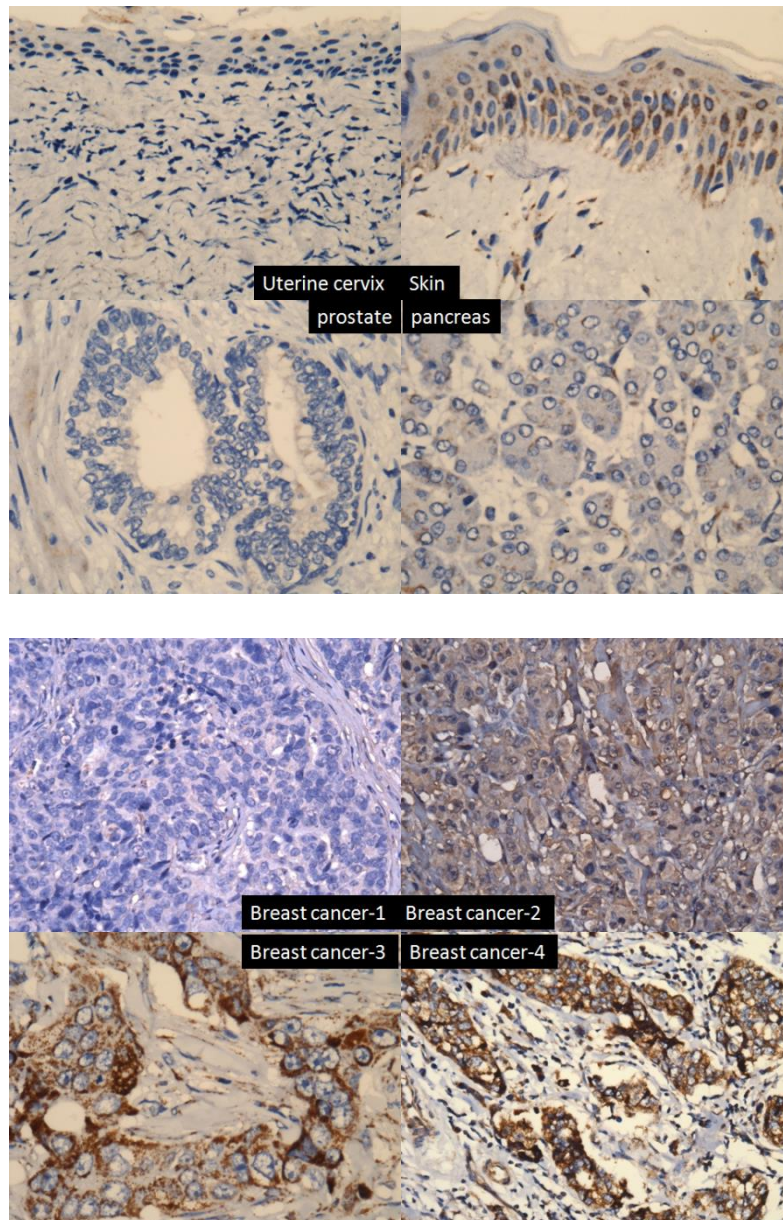

Supplement: 41598_2020_64950_MOESM1_ESM.pdf [file 41598_2020_64950_MOESM1_ESM.pdf]
